# Supplementary material
Source: MDPI journal article supplement (https://www.mdpi.com/2624-8549/4/1/6)
Supplement: s1 [file s1 › chemistry-1550215-supplementary.pdf]

**Table S1.** The absorbed amount of products in the stone specimens

| Samples       | Absorbed amounts (g/m <sup>2</sup> ) |
|---------------|--------------------------------------|
| PDMS_LS       | 24.5 ±0.5                            |
| Zn-Zr-PDMS_LS | 23.6 ±0.6                            |
| PDMS_B        | 16.8 ±0.9                            |
| Zn-Zr-PDMS_B  | 15.6 ±0.5                            |
| PDMS_M        | 8.4 ±0.2                             |
| Zn-Zr-PDMS_M  | 8.8 ±0.2                             |

**Table S2.** Contact angle measurements of treated stones before and after ageing processes

| Samples       | $\alpha$ (°)  |                                             |                                            |
|---------------|---------------|---------------------------------------------|--------------------------------------------|
|               | Before ageing | Humid chamber ageing<br>(RH>80%, T=22±3 °C) | Artificial solar ageing<br>(300 W, 1000 h) |
| PDMS_LS       | 111 ±1        | 97 ±4                                       | 100 ±2                                     |
| Zn-Zr-PDMS_LS | 131 ±2        | 125 ±3                                      | 128 ±2                                     |
| PDMS_B        | 128 ±1        | 120 ±1                                      | 122 ±1                                     |
| Zn-Zr-PDMS_B  | 136 ±2        | 130 ±1                                      | 129 ±3                                     |
| PDMS_M        | 98 ±2         | 95 ±1                                       | 98 ±1                                      |
| Zn-Zr-PDMS_M  | 107 ±3        | 100 ±2                                      | 103 ±1                                     |
